# Supplementary material for: The tRNA-Derived Fragment tRF-24-V29K9UV3IU Functions as a miRNA-like RNA to Prevent Gastric Cancer Progression by Inhibiting GPR78 Expression
Source: PubMed Central journal article supplement (PMC9077451; doi:10.1155/2022/8777697), 2022-04-29
Supplement: 8777697.f1.pdf [file 8777697.f1.pdf]

Supplemental Table 1. Primers information used in this study.

| Name                       | Sequences (5' – 3')                                  |
|----------------------------|------------------------------------------------------|
| GAPDH-F                    | AGAAGGCTGGGGCTCATT                                   |
| GAPDH-R                    | TGCTAAGCAGTTGGTGGTG                                  |
| OLR1-F                     | TGCTTCACTCTCTCATTCTTAGC                              |
| OLR1-R                     | CACCATGGAGAGTAAAGAAACTG                              |
| GPR78-F                    | GGGTCTCCTGGTGATGGTAC                                 |
| GPR78-R                    | TGTCCAGGAAGCCAATGACT                                 |
| VEPH1-F                    | TGGAACATAACCTGAGACCCT                                |
| VEPH1-R                    | TCCTGCACAGTTCCTTGTTG                                 |
| tRF-24 mimics              | UAGGAUGGGGUGUGAUAGGUGGCA<br>UGCCACCUAUCACACCCCAUCCUA |
| mimics NC                  | UUCUCCGAACGUGUCACGUTT<br>ACGUGACACGUUCGGAGAATT       |
| U6-F                       | CGATACAGAGAAGATTAGCATGGC                             |
| U6-R                       | ACGCTTCACGAATTTGCGT                                  |
| tRF-24-F                   | CCGACGATCTAGGATGGGGT                                 |
| tRF-24-R                   | CTCTTCCGATCTTGCCACCTAT                               |
| RNA 5' Adapter (RA5), part | GTTCAGAGTTCTACAGTCCGACGATC                           |
| RNA 3' Adapter (RA3), part | AGATCGGAAGAGCACACGTCT                                |
| Vimentin-R                 | AACTTACAGCTGGGCCATCG                                 |
| Vimentin-F                 | AGTCCGCACATTCGAGCAAA                                 |
| E-cadherin-F               | GTCTCCTCTTGCTCTGC                                    |
| E-cadherin-R               | CTGTCCTTTGTCGACCGGT                                  |
| N-cadherin-F               | GCCCAAGACAAAGAGACCCA                                 |
| N-cadherin-R               | TGGCCACTGTGCTTACTGAA                                 |
