# Supplementary material for: The tRNA-Derived Fragment tRF-24-V29K9UV3IU Functions as a miRNA-like RNA to Prevent Gastric Cancer Progression by Inhibiting GPR78 Expression
Source: PubMed Central journal article supplement (PMC9077451; doi:10.1155/2022/8777697), 2022-04-29
Supplement: 8777697.f2.pdf [file 8777697.f2.pdf]

Supplemental Table 2. Clean data quality control and statistics.

| Samples | Total Reads<br>Filter | Reads<br>Filter<br>(%) | Total Bases<br>Filter | Bases<br>Filter<br>(%) | GC (%) | Mapped<br>Rate (%) |
|---------|-----------------------|------------------------|-----------------------|------------------------|--------|--------------------|
| NC1     | 20291818              | 0.952                  | 3059446650            | 0.951                  | 53.5   | 0.919              |
| NC 2    | 29780738              | 0.954                  | 4490417526            | 0.952                  | 53.5   | 0.907              |
| NC 3    | 30535674              | 0.949                  | 4604137280            | 0.948                  | 53.5   | 0.903              |
| tRF24-1 | 37773348              | 0.941                  | 5696351544            | 0.940                  | 54.5   | 0.923              |
| tRF24-2 | 20000744              | 0.937                  | 3015099846            | 0.936                  | 54.5   | 0.907              |
| tRF24-3 | 43122062              | 0.936                  | 6502386005            | 0.935                  | 54.5   | 0.906              |
